# Supplementary material for: Injury and death during the ISIS occupation of Mosul and its liberation: Results from a 40-cluster household survey
Source: PubMed Central journal article supplement (PMC5953440; doi:10.1371/journal.pmed.1002567), 2018-05-15
Supplement: pmed.1002567.s002.pdf [file pmed.1002567.s002.pdf]

## S2. Mosul household questionnaire (Injury and mortality section)

Date \_\_\_\_\_ Interviewer code \_\_\_\_\_

Cluster No \_\_\_\_\_ Family No. \_\_\_\_\_ Is this a replacement Household?  YES  NO

Has household consented?  YES  NO *if no please stop unless consented*

1. Has this household been continuously present in Mosul since June 2014  YES  NO *if no please stop*

### 2. Present in the household from June 2014

| Given name    | age | sex | Education code                                                                      | Employment code                                                                                 | Injury since June 2014 Y/N | Missing since June 2014 Y/N                                                                                            | Death since June 2014 Y/N |
|---------------|-----|-----|-------------------------------------------------------------------------------------|-------------------------------------------------------------------------------------------------|----------------------------|------------------------------------------------------------------------------------------------------------------------|---------------------------|
| 1. House head |     |     |                                                                                     |                                                                                                 |                            |                                                                                                                        |                           |
| 2.            |     |     |                                                                                     |                                                                                                 |                            |                                                                                                                        |                           |
| 3.            |     |     |                                                                                     |                                                                                                 |                            |                                                                                                                        |                           |
| 4.            |     |     |                                                                                     |                                                                                                 |                            |                                                                                                                        |                           |
| 5.            |     |     |                                                                                     |                                                                                                 |                            |                                                                                                                        |                           |
| 6             |     |     |                                                                                     |                                                                                                 |                            |                                                                                                                        |                           |
| 7.            |     |     |                                                                                     |                                                                                                 |                            |                                                                                                                        |                           |
| 8             |     |     |                                                                                     |                                                                                                 |                            |                                                                                                                        |                           |
| 9             |     |     |                                                                                     |                                                                                                 |                            |                                                                                                                        |                           |
| 10.           |     |     |                                                                                     |                                                                                                 |                            |                                                                                                                        |                           |
| 11.           |     |     |                                                                                     |                                                                                                 |                            |                                                                                                                        |                           |
| 12            |     |     |                                                                                     |                                                                                                 |                            |                                                                                                                        |                           |
|               |     |     | 1=none<br>2=in school<br>3=primary school<br>4=secondary school<br>5=post secondary | 1=works full time<br>2=works part time<br>3=unemployed<br>4=student<br>5=housewife<br>6=retired |                            | 1=Kidnapped<br>2=presumed to be alive in Mosul<br>3=presumed to be alive outside Mosul<br>4=probably dead<br>5=unknown |                           |

3. Since JUNE 2014, have there been any DEATHS among adults or children who were living in this household?

*For questions (f) and (h) select the choice that most closely matches the description provided by the person—Do not read out the options.*

| Death no. (a) | Sex M/F (b) | Date of death? month & year (c) | Age at death? (d) | Relation to key informant (e) | What was the cause of death? (f) | Was death conflict related? Y/N/DK (g) | If conflict-related, What was the cause? (h) |
|---------------|-------------|---------------------------------|-------------------|-------------------------------|----------------------------------|----------------------------------------|----------------------------------------------|
|               |             |                                 |                   |                               |                                  |                                        |                                              |
|               |             |                                 |                   |                               |                                  |                                        |                                              |
|               |             |                                 |                   |                               |                                  |                                        |                                              |

**(e):** 1=wife, 2=husband, 3=son, 4=daughter, 5=mother, 6=father, 7=sister, 8=brother, 9=mother-in-law, 10=father-in-law, 11=sister-in-law, 12=brother-in-law, 13=nephew, 14=niece, 15=grandson, 16=granddaughter, 17=other

**(f):** 1=diarrhea, 2=respiratory, 3=pre-term, 4=neonatal causes, 5=cancer/tumor, 6=cardiovascular disease, 7=lung disease, 8=liver disease, 9=kidney condition, 10=maternal causes, 11=self-inflicted injury, 12=injury (not conflict-related), 13=injury (conflict-related), 14=other, 15=don't know

Mosul Questionnaire, page 1

**(h):** 1=gunshot, 2=stabbing, 3=beheading, 4=car bomb, 5=road accident that was conflict-related, 6=airstrike, 7=other explosion, 8=other conflict-related injury, 9=don't know

4. Since JUNE 2014, have there been any INJURIES among persons who were living in this household?

**Injury Definition:** An intentional or unintentional physical event that requires medical care and/or intervention and results in loss or reduction in normal activities for a while For questions (f), (g), (i), and (k) select the choice that most closely matches the description provided by the person—Do not read out the options.

| House hold list no.<br>(a) | Sex M/F<br>(b) | Date of injury? month & year<br>(c) | Age at injury ?<br>(d) | Relation to key informant<br>(e) | Parts of the body injured? (more than one possible)<br>(f) | The cause of injury?<br>(g) | Was injury conflict related? Y/N/DK<br>(h) | If yes, What was the cause?<br>(i) | Current status of injured<br>(j) | Treatment Received on day of injury<br>(k) |
|----------------------------|----------------|-------------------------------------|------------------------|----------------------------------|------------------------------------------------------------|-----------------------------|--------------------------------------------|------------------------------------|----------------------------------|--------------------------------------------|
|                            |                |                                     |                        |                                  |                                                            |                             |                                            |                                    |                                  |                                            |
|                            |                |                                     |                        |                                  |                                                            |                             |                                            |                                    |                                  |                                            |
|                            |                |                                     |                        |                                  |                                                            |                             |                                            |                                    |                                  |                                            |

(e): 1=wife, 2=husband, 3=son, 4=daughter, 5=mother, 6=father, 7=sister, 8=brother, 9=mother-in-law, 10=father-in-law, 11=sister-in-law, 12=brother-in-law, 13=nephew, 14=niece, 15=grandson, 16=granddaughter, 17=other 18=daughter-in-law

(f):1=head, 2=face, 3=neck, 4=chest, 5=back or spine, 6=abdomen, 7=upper extremity (except hand), 8=hand, 9=lower extremity

(g): 1=burn, 2=electrical, 3=fall, 4=poisoning, 5=mechanical (such as industrial trauma), 6=explosion (unintended violence), 7=suicidal intent, 8=transportation related, 9=intentional violence; 10=other, 11=don't know

(i): 1=gunshot, 2=penetrating wounds (including stab wounds), 3=shell injuries/fragment, 4=blast/explosive injury, 7=burns, 8=torture (prisoners), 9=other, 10=don't know

(j): 1=alive and functioning normally, 2=alive with reduced function, 3=dead 4= still under treatment

(k): 1=home treatment, 2=treated in surgery or clinic (outpatient), 3=Admitted to hospital (inpatient), 4=no treatment received

5. Was any member of this household kidnapped during or after June 2014?

| Kidnapped no.<br>(a) | Sex<br>M/F<br>(b) | Date of kidnapping?<br>month & year<br>(c) | Age at kidnapping?<br>(d) | Relation to key informant<br>(e) | Current status?<br>(f) |
|----------------------|-------------------|--------------------------------------------|---------------------------|----------------------------------|------------------------|
|                      |                   |                                            |                           |                                  |                        |
|                      |                   |                                            |                           |                                  |                        |
|                      |                   |                                            |                           |                                  |                        |

(e): 1=wife, 2=husband, 3=son, 4=daughter, 5=mother, 6=father, 7=sister, 8=brother, 9=mother-in-law, 10=father-in-law, 11=sister-in-law, 12=brother-in-law, 13=nephew, 14=niece, 15=grandson, 16=granddaughter, 17=other 18=Daughter-in-law

(f): 1=still missing, 2=released/escaped, 3=dead
